# Supplementary material for: DebrisInterMixing-2.3: a finite volume solver for three-dimensionaldebris-flow simulations with two calibration parameters – Part 2:Model validation
Source: Copernicus journal article supplement (doi:10.5194/gmd-2017-25), 2017-02-28
Supplement: Supplementary file 1 [file gmd-2017-25-supplement.zip]

# OpenFOAM-2.3.x

The debris flow solver debrisInterMixing-2.3 is based on the open-source CFD code OpenFOAM, version 2.3.x. To install debrisInterMixing-2.3, it is necessary to compile OpenFOAM-2.3.x.

The following text is a selection of copied installation instructions for OpenFOAM-2.3.x from the OpenFOAM Foundation, <http://www.openfoam.org/>

Downloading the source code for OpenFOAM-2.3.x should be possible following the instructions. However, compiling OpenFOAM-2.3.x needs some system-specific steps as described at <http://www.openfoam.org/download/git.php>

Version 2.3.x: This page describes how to download the source code of OpenFOAM-2.3.x

## Git Software

The sources can be obtained using the [Git open source version control system](#) that is commonly available on Linux distributions. Those with administrator permission can install the git software, e.g. by first switching to root user with sudo by typing in a terminal

```
sudo su -
```

On Ubuntu, git can be installed by executing the following command in a terminal prompt

```
apt-get install git-core
```

Similarly it can be installed on OpenSuSE by the following command.

```
zypper install git-core
```

Also it can be installed on RHEL by the following command.

```
yum install git
```

## Downloading the Sources

The user should choose a directory location to download and unpack the files, which will become the installation directory of OpenFOAM. If the installation is for a single user only, or if the user does not have root access to the machine, we would recommend the installation directory is \$HOME/OpenFOAM (i.e. a directory OpenFOAM in the user's home directory). If the installer has root permissions and the installation is for more than one user, one of the 'standard' locations can be used, e.g. /usr/local/OpenFOAM, /opt/OpenFOAM, or just /opt. After the installation directory is chosen (and, if necessary, created) download and unpack OpenFOAM-2.3.x and ThirdParty-2.3.0 as follows.

### OpenFOAM-2.3.x

The OpenFOAM-2.3.x repository is available at <https://github.com/OpenFOAM/OpenFOAM-2.3.x>. From the OpenFOAM installation root directory the repository can be obtained using

the https protocol (https://):

- `git clone https://github.com/OpenFOAM/OpenFOAM-2.3.x`

Note: Copy-pasting the link in Ubuntu may cause a difference in the ‘-‘ character. One may need to search under <https://github.com/OpenFOAM> for the correct link. Furthermore, while the TCP port for https is rarely blocked by a firewall, download hangs have been experienced; upgrading to git version 1.7 seems to overcome this problem.

Either of the commands above will create an OpenFOAM-2.3.x directory that the user can subsequently be updated to the latest published copy using

- `cd OpenFOAM-2.3.x`
- `git pull`

Please compile OpenFOAM-2.3.x in analogy to the instructions given in <http://www.openfoam.org/download/git.php> but please rename the ThirdParty folder to ThirdParty-2.3.x and place it in the OpenFOAM directory and add

```
source $HOME/OpenFOAM/OpenFOAM-2.3.x/etc/bashrc
```

OR

```
source $HOME/OpenFOAM/OpenFOAM-2.3.x/etc/cshrc
```

to your \$HOME/.bashrc or \$HOME/.cshrc file

After a successful OpenFOAM-2.3.x installation in \$HOME/OpenFOAM/, debrisInterMixing-2.3 can be downloaded and installed:

## debrisInterMixing-2.3

The debrisInterMixing solver is based on an adaptation of the interMixingFoam solver and is used in combination with two rheology models, named HerschelBulkleyDebrisFlow for the slurry and PudasainiCoulombViscoPlastic for the gravel phase. In order to make the solver and the viscosity models available within the OpenFOAM installation, one needs to download and compile the corresponding code in a folder ‘userName-2.3.x’ at \$HOME/OpenFOAM/, where ‘userName’ should be the user’s name. A user named henry would need to download & compile the code in a folder \$HOME/OpenFOAM/henry-2.3.x.

## Downloading the Sources

Download and extract the supplement and move the folder “applications” into the \$HOME/OpenFOAM/‘userName-2.3.x’ directory. Updates and news can be found on [http://www.wsl.ch/fe/gebirgshydrologie/downloads/index\\_DE](http://www.wsl.ch/fe/gebirgshydrologie/downloads/index_DE)

## Compiling the solver

In a terminal window, change to the folder (cd command) `$HOME/OpenFOAM/'userName-2.3.x'/applications/solvers/multiphase/interFoam`

Then type

```
wmake debrisInterMixingFoam
```

to compile the solver. Typing `debrisInterMixingFoam` should give an output starting with the OpenFOAM header and ending with FOAM exiting following the IO ERROR if the installation was successful.

## Compiling the rheology models

Change to the folder `$HOME/OpenFOAM/'userName-2.3.x'/applications/transportModels/` and type

```
wmake incompressible
```

to make `HerschelBulkleyDebrisFlow` and `PudasainiCoulombViscoPlastic` available.

In case of difficulties it may help to replace the folder

```
$HOME/OpenFOAM/'userName-2.3.x'/applications/transportModels
```

with the folder

```
$HOME/OpenFOAM/OpenFOAM-2.3.x/src/transportModels
```

and manually copy the folders `HerschelBulkleyDebrisFlow` and `PudasainiCoulombViscoPlastic` from the `applications/transportModels/incompressible/viscosityModels`

directory of the supplement to the

```
$HOME/OpenFOAM/'userName-2.3.x'/applications/transportModels/incompressible/viscosityModels
```

folder. But in this case one needs to add the lines

```
viscosityModels/HerschelBulkleyDebrisFlow/HerschelBulkleyDebrisFlow.C
```

```
viscosityModels/PudasainiCoulombViscoPlastic/PudasainiCoulombViscoPlastic.C
```

before `transportModel/transportModel.C` in the 'files' file in the directory

```
HOME/OpenFOAM/'userName-2.3.x'/applications/transportModels/incompressible/Make
```

# Getting started

The calibration experiment of Hürlimann et al. (2015) used in von Boetticher et al. (2017) is included as an example case in the applications/run folder.

In a terminal, change the directory to

```
$HOME/OpenFOAM/'userName-2.3.x'/applications/run/10_4060_0,285
```

and type the three commands:

```
blockMesh
```

```
setFields
```

```
debrisInterMixingFoam
```

to run the case in serial. For parallel computation please refer to the OpenFOAM tutorials at [www.openfoam.org](http://www.openfoam.org). Time step and writing interval settings are defined in system/controlDict, material properties are set in constant/transportProperties. A coarser mesh with doubled cell sizes in all directions can be created by deleting the constant/polyMesh/blockMeshDict, renaming blockMeshDict\_coarse to blockMeshDict. If the dense mesh case was created before, the 0 directory needs to be replaced with the initial 0 directory as downloaded.

## References:

Hürlimann, M., McArdell, W., and Rickli, C.: Field and laboratory analysis of the runout characteristics of hillslope debris flows in Switzerland, *Geomorphology*, 232, 20–32, doi:10.1016/j.geomorph.2014.11.030, 2015.

v. Boetticher, A., Turowski, J. M., McArdell, W. B., Rickenmann, D., Hürlimann, M., Scheidl, C., and Kirchner, J. W.: (submitted) DebrisInterMixing-2.3: a finite volume solver for three-dimensional debris-flow simulations with two calibration parameters - Part 2: Model validation, *Geoscientific Model Development*, 2017.
